# Supplementary material
Source: PubMed Central journal article supplement (PMC2504530)
Supplement: NIHMS60928-supplement-si20060119_043.pdf [file NIHMS60928-supplement-si20060119_043.pdf]

## Supplementary Material

### I. Atom types and partial charges

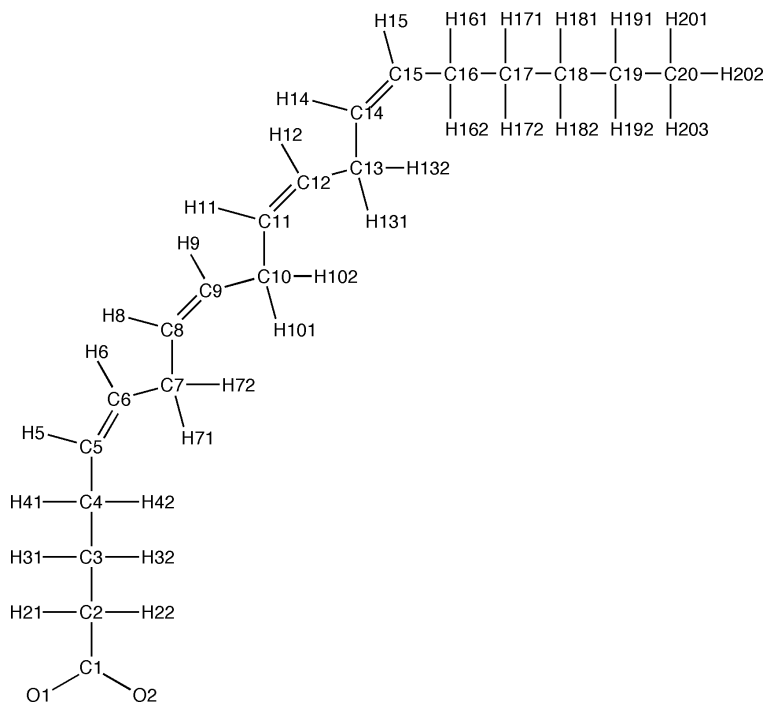

**Figure 1.** Arachidonate

| Atom | Atom Type | Charge    | Atom | AtomType | Charge    |
|------|-----------|-----------|------|----------|-----------|
| O1   | O2        | -0.811171 | H11  | HA       | 0.147859  |
| C1   | C         | 0.762308  | C12  | CE       | -0.390927 |
| O2   | O2        | -0.811171 | H12  | HA       | 0.169130  |
| C2   | CT        | -0.015634 | C13  | CT       | 0.123394  |
| H21  | HC        | -0.015870 | H131 | HC       | 0.042885  |
| H22  | HC        | -0.015870 | H132 | HC       | 0.042885  |
| C3   | CT        | 0.089950  | C14  | CE       | -0.112461 |
| H31  | HC        | -0.015841 | H14  | HA       | 0.103696  |
| H32  | HC        | -0.015841 | C15  | CE       | -0.265169 |
| C4   | CT        | -0.010998 | H15  | HA       | 0.130690  |
| H41  | HC        | 0.008264  | C16  | CT       | -0.038861 |
| H42  | HC        | 0.008264  | H161 | HC       | 0.049073  |
| C5   | CE        | -0.202746 | H162 | HC       | 0.049073  |
| H5   | HA        | 0.116380  | C17  | CT       | -0.094888 |
| C6   | CE        | -0.235123 | H171 | HC       | 0.036349  |
| H6   | HA        | 0.128573  | H172 | HC       | 0.036349  |
| C7   | CT        | -0.028435 | C18  | CT       | 0.042591  |
| H71  | HC        | 0.077629  | H181 | HC       | 0.003300  |
| H72  | HC        | 0.077629  | H182 | HC       | 0.003300  |
| C8   | CE        | -0.085005 | C19  | CT       | 0.025082  |
| H8   | HA        | 0.112510  | H191 | HC       | -0.004119 |
| C9   | CE        | -0.315904 | H192 | HC       | -0.004119 |
| H9   | HA        | 0.136387  | C20  | CT       | -0.089275 |
| C10  | CT        | 0.065034  | H201 | HC       | 0.016405  |
| H101 | HC        | 0.046590  | H202 | HC       | 0.016405  |
| H102 | HC        | 0.046590  | H203 | HC       | 0.016405  |
| C11  | CE        | -0.151551 |      |          |           |

## II. Potential function parameters

Additional parameters needed for arachidonate, including the definition of new atom type CE for homoconjugated cis double bonded carbons

Table 1: Parameters for bond terms:

$$E_{\text{bond}} = K_b (R - R_b)^2$$

|       | $K_b$ | $R_b$ |
|-------|-------|-------|
| CE-CE | 560.  | 1.320 |
| CE-HA | 367.  | 1.080 |
| CE-CT | 317.  | 1.510 |

Table 2: Parameters for bond angle terms:

$$E_{\text{angle}} = K_{\theta} (R - \theta)^2$$

|          | $K_{\theta}$ | $\theta$ |
|----------|--------------|----------|
| CE-CE-HA | 35.          | 113.3    |
| CE-CE-CT | 63.          | 127.0    |
| CE-CT-HC | 50.          | 109.5    |
| CE-CT-CT | 70.          | 109.5    |
| CT-CE-HA | 50.          | 119.7    |
| CE-CT-CE | 50.          | 118.5    |

Table 3: Parameters for torsion angle terms:

$$E_{\text{tors}} = (PK / \text{IDIVF}) * (1 + \cos (PN * \text{phi} - \text{PHASE}))$$

|             | IDIVF | PK   | PHASE | PN  |
|-------------|-------|------|-------|-----|
| X-CE-CE-X   | 4     | 26.6 | 180.  | 2.  |
| X-CE-CT-X   | 6     | 0.0  | 0.    | 1.  |
| CE-CE-CT-CT | 1     | 0.15 | 180.  | -5. |
| CE-CE-CT-CT | 1     | 0.30 | 180.  | -4. |
| CE-CE-CT-CT | 1     | 0.80 | 180.  | -3. |
| CE-CE-CT-CT | 1     | 0.20 | 0.    | -2. |
| CE-CE-CT-CT | 1     | 0.80 | 0.    | 1.  |
| CE-CE-CT-CE | 1     | 0.08 | 0.    | -4. |
| CE-CE-CT-CE | 1     | 0.60 | 180.  | -3. |
| CE-CE-CT-CE | 1     | 0.65 | 0.    | -2. |
| CE-CE-CT-CE | 1     | 1.10 | 0.    | 1.  |

Table 4: Parameters for improper torsion terms:

$$E_{\text{tors}} = (PK) * (1 + \cos (PN * \text{phi} - \text{PHASE}))$$

|           | PK  | PHASE | PN |
|-----------|-----|-------|----|
| X-X-CE-HA | 1.1 | 180.  | 2. |

Table 5: Parameters for nonbonded interaction terms:

|    | $R^*$  | $\epsilon$ |
|----|--------|------------|
| CE | 1.9080 | 0.0860     |

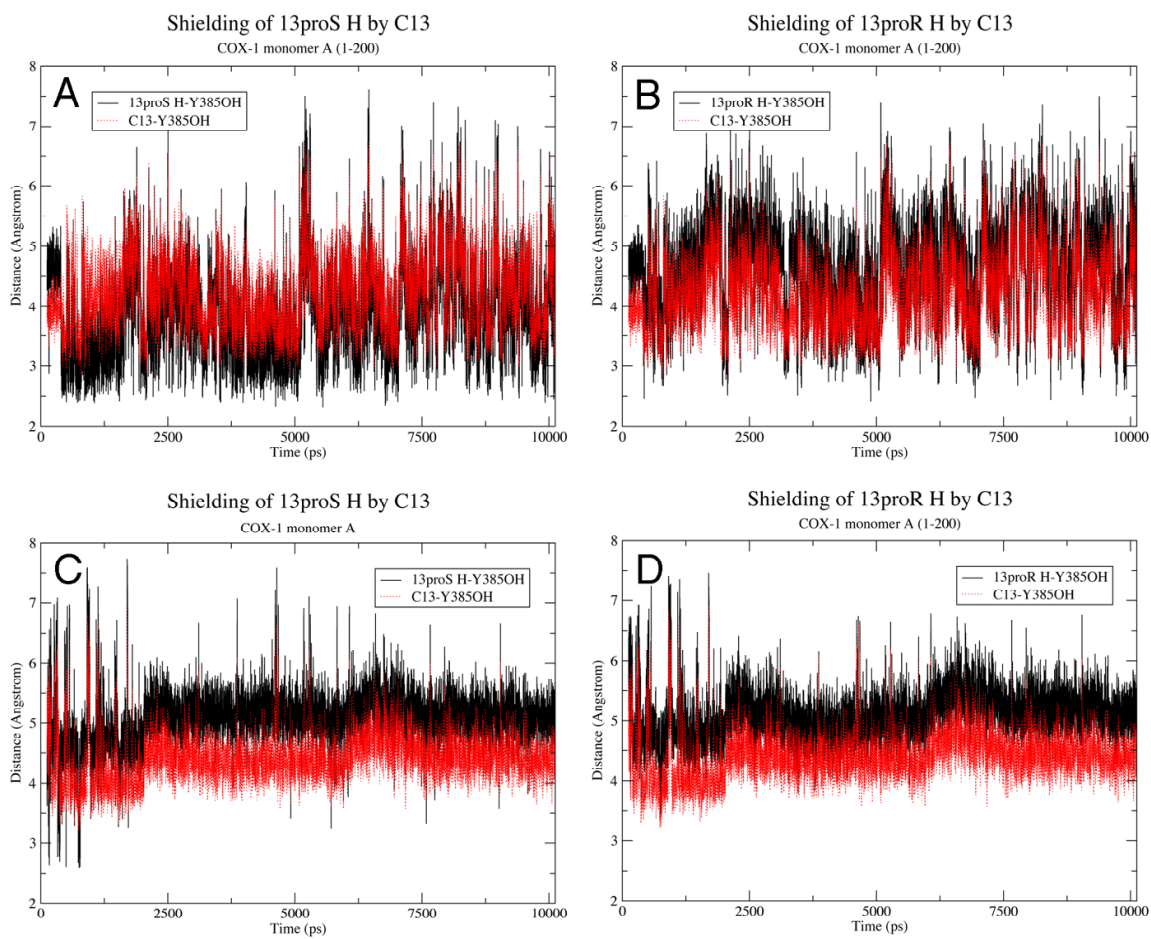

**Figure 2.** Distances between C13, 13pro-*S* or 13pro-*R* hydrogens and the oxygen atom of Tyr-385 over the COX-1/ACD simulation for monomer A (A, B) and monomer B (C, D). Comparison of all three distances gives an approximate picture of the degree to which C13 shields one or both hydrogens from abstraction. Panels A and B demonstrate that for COX-1 monomer A, the 13pro-*S* hydrogen is consistently more accessible to Tyr-385 (shorter pro-*S*–Tyr-385-O distance) than the 13pro-*R* hydrogen, suggesting a catalytically productive conformation where the 13pro-*S* hydrogen would be preferentially abstracted by Tyr-385. Panels C and D show that for COX-1 monomer B, C13 is nearly always closer to Tyr-385 than either hydrogen, apparently shielding them from abstraction and suggesting a catalytically unproductive conformation.

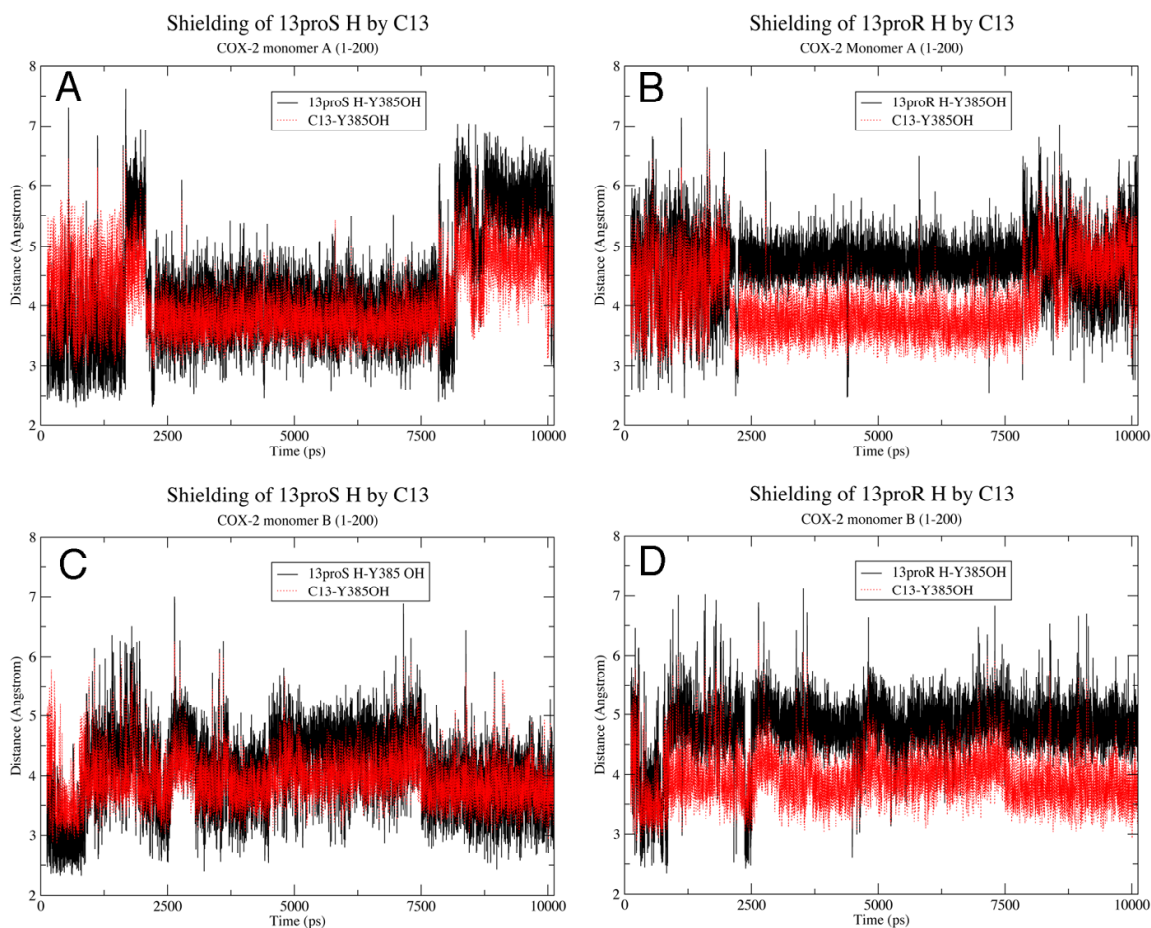

**Figure 3.** Distances between C13, 13pro-*S* or 13pro-*R* hydrogens and the oxygen atom of Tyr-385 over the COX-2/ACD simulation for monomer A (A, B) and monomer B (C, D). Unlike COX-1 (Figure 2), which demonstrated clear catalytically productive behavior in one monomer (Figure 2A,B), and clear catalytically unproductive behavior the other monomer (Figure 2C,D), COX-2 demonstrates intermediate behavior in both monomers. For both monomers the pro-*S* hydrogen is significantly exposed to Tyr-385 (panels A and C, pro-*S*—Tyr385 O distance shorter than C13—Tyr385 O distance), while the 13pro-*R* hydrogen is nearly always shielded by C13 (panels B and D). However, in the final 2 ns, it appears that the 13pro-*R* hydrogen is preferentially exposed in monomer A (panels A and B).
